CORRECTION

# Correction: Carbohydrate Recognition Specificity of Trans-sialidase Lectin Domain from *Trypanosoma congolense*

Mario Waespy, Thaddeus T. Gbem, Leroy Elenschneider, André-Philippe Jeck, Christopher J. Day, Lauren Hartley-Tassell, Nicolai Bovin, Joe Tiralongo, Thomas Haselhorst, Sørge Kelm

In [Fig 2](#) the glycan name adjacent to ID 1M is listed incorrectly, and in [Fig 7](#), the image in the lower panel is not rotated 90 degrees as indicated. Please see the corrected figures here.

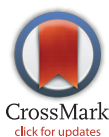

## OPEN ACCESS

**Citation:** Waespy M, Gbem TT, Elenschneider L, Jeck A-P, Day CJ, Hartley-Tassell L, et al. (2015) Correction: Carbohydrate Recognition Specificity of Trans-sialidase Lectin Domain from *Trypanosoma congolense*. PLoS Negl Trop Dis 9(12): e0004344. doi:10.1371/journal.pntd.0004344

**Published:** December 29, 2015

**Copyright:** © 2015 Waespy et al. This is an open access article distributed under the terms of the [Creative Commons Attribution License](#), which permits unrestricted use, distribution, and reproduction in any medium, provided the original author and source are credited.

| ID  | Glycan name                                             | Glycan structure                                                                                 | Domain          |  | TconTS1<br>-LD |   | TconTS2<br>-LD |   | TconTS3<br>-LD |   | TconTS4<br>-LD |   |
|-----|---------------------------------------------------------|--------------------------------------------------------------------------------------------------|-----------------|--|----------------|---|----------------|---|----------------|---|----------------|---|
|     |                                                         |                                                                                                  | $\alpha$ -Helix |  | -              | + | -              | + | -              | + | -              | + |
| 1B  | <i>N</i> -Acetyllactosamine                             | Gal $\beta$ 1-4GlcNAc                                                                            |                 |  |                |   | ■              | ■ |                |   |                |   |
| 1E  | $\beta$ -1-3 Galactosyl- <i>N</i> -acetyl galactosamine | Gal $\beta$ 1-3GalNAc                                                                            |                 |  |                |   | ■              | ■ |                |   |                |   |
| 1M  | TF Antigen                                              | Gal $\beta$ 1-3GalNAc $\alpha$ 1-O-Ser                                                           |                 |  |                |   | ■              | ■ |                |   |                |   |
| 1N  | $\alpha$ 1-3 Galactobiose                               | Gal $\alpha$ 1-3Gal                                                                              |                 |  |                | ■ | ■              | ■ |                |   |                |   |
| 1P  | Linear B Trisaccharide                                  | Gal $\alpha$ 1-3Gal $\beta$ 1-4Glc                                                               |                 |  |                |   | ■              | ■ |                |   |                |   |
| 2A  | $\alpha$ 1-3, $\beta$ 1-4, $\alpha$ 1-3 Galactotetraose | Gal $\alpha$ 1-3Gal $\beta$ 1-4Gal $\alpha$ 1-3Gal                                               |                 |  |                |   | ■              | ■ |                |   |                |   |
| 2B  | Gal $\beta$ 1-6Gal                                      | Gal $\beta$ 1-6Gal                                                                               |                 |  |                |   | ■              | ■ |                |   |                |   |
| 2D  | GalNAc $\beta$ 1-4Gal                                   | GalNAc $\beta$ 1-4Gal                                                                            |                 |  |                |   | ■              | ■ |                |   |                |   |
| 2E  | Gal $\alpha$ 1-4Gal $\beta$ 1-4GlcNAc                   | Gal $\alpha$ 1-4Gal $\beta$ 1-4GlcNAc                                                            |                 |  |                |   | ■              | ■ |                |   |                |   |
| 4D  | <i>N,N,N',N'',N''',N''''</i> -Hexaacetyl chitohexaose   | GlcNAc $\beta$ 1-4GlcNAc $\beta$ 1-4GlcNAc $\beta$ 1-4GlcNAc $\beta$ 1-4GlcNAc $\beta$ 1-4GlcNAc |                 |  |                | ■ | ■              | ■ |                |   |                |   |
| 5F  | $\alpha$ 1-6 Mannobiose                                 | Man $\alpha$ 1-6Man                                                                              |                 |  |                |   | ■              | ■ |                |   |                |   |
| 5G  | $\alpha$ 1-3, $\alpha$ 1-6 Mannotriose                  | Man $\alpha$ 1-6(Man $\alpha$ 1-3)Man                                                            |                 |  |                |   | ■              | ■ |                |   |                |   |
| 7A  | Lacto- <i>N</i> -fucopentaose I                         | Fuc $\alpha$ 1-2Gal $\beta$ 1-3GlcNAc $\beta$ 1-3Gal $\beta$ 1-4Glc                              |                 |  |                |   | ■              | ■ |                |   |                |   |
| 7B  | Lacto- <i>N</i> -fucopentaose II                        | Gal $\beta$ 1-3(Fuc $\alpha$ 1-4)GlcNAc $\beta$ 1-3Gal $\beta$ 1-4Glc                            |                 |  |                |   | ■              | ■ |                |   |                |   |
| 7K  | Blood Group A trisaccharide                             | GalNAc $\alpha$ 1-3(Fuc $\alpha$ 1-2)Gal                                                         |                 |  |                |   | ■              | ■ |                |   |                |   |
| 7M  | Blood Group B Trisaccharide                             | Gal $\alpha$ 1-3(Fuc $\alpha$ 1-2)Gal                                                            |                 |  |                |   | ■              | ■ |                |   |                |   |
| 7N  | Lewis y                                                 | Fuc $\alpha$ 1-2Gal $\beta$ 1-4(Fuc $\alpha$ 1-3)GlcNAc                                          |                 |  |                |   | ■              | ■ |                |   |                |   |
| 7O  | Blood Group H Type II Trisaccharide                     | Fuc $\alpha$ 1-2Gal $\beta$ 1-4GlcNAc                                                            |                 |  |                |   | ■              | ■ |                |   |                |   |
| 10A | Sialyl Lewis a                                          | Neu5Ac $\alpha$ 2-3Gal $\beta$ 1-3(Fuc $\alpha$ 1-4)GlcNAc                                       |                 |  |                |   | ■              | ■ |                |   |                |   |
| 10K | 3'-Sialyllactosamine                                    | Neu5Ac $\alpha$ 2-3Gal $\beta$ 1-4GlcNAc                                                         |                 |  |                |   | ■              | ■ |                |   |                |   |

**Fig 2. Summary of TconTS-LDs binding to glycans as determined by glycan array analysis.** TconTS-LDs binding to the glycan arrays was determined as described under Methods. Black bars indicate glycans bound by the TconTS-LDs. The presence and absence of the  $\alpha$ -helix in TconTS-LD constructs is indicated with “+” and “-”, respectively. Further binding data (S2 Fig) and all glycans on the arrays (S1 Table) are available as Supporting Information.

doi:10.1371/journal.pntd.0004344.g001

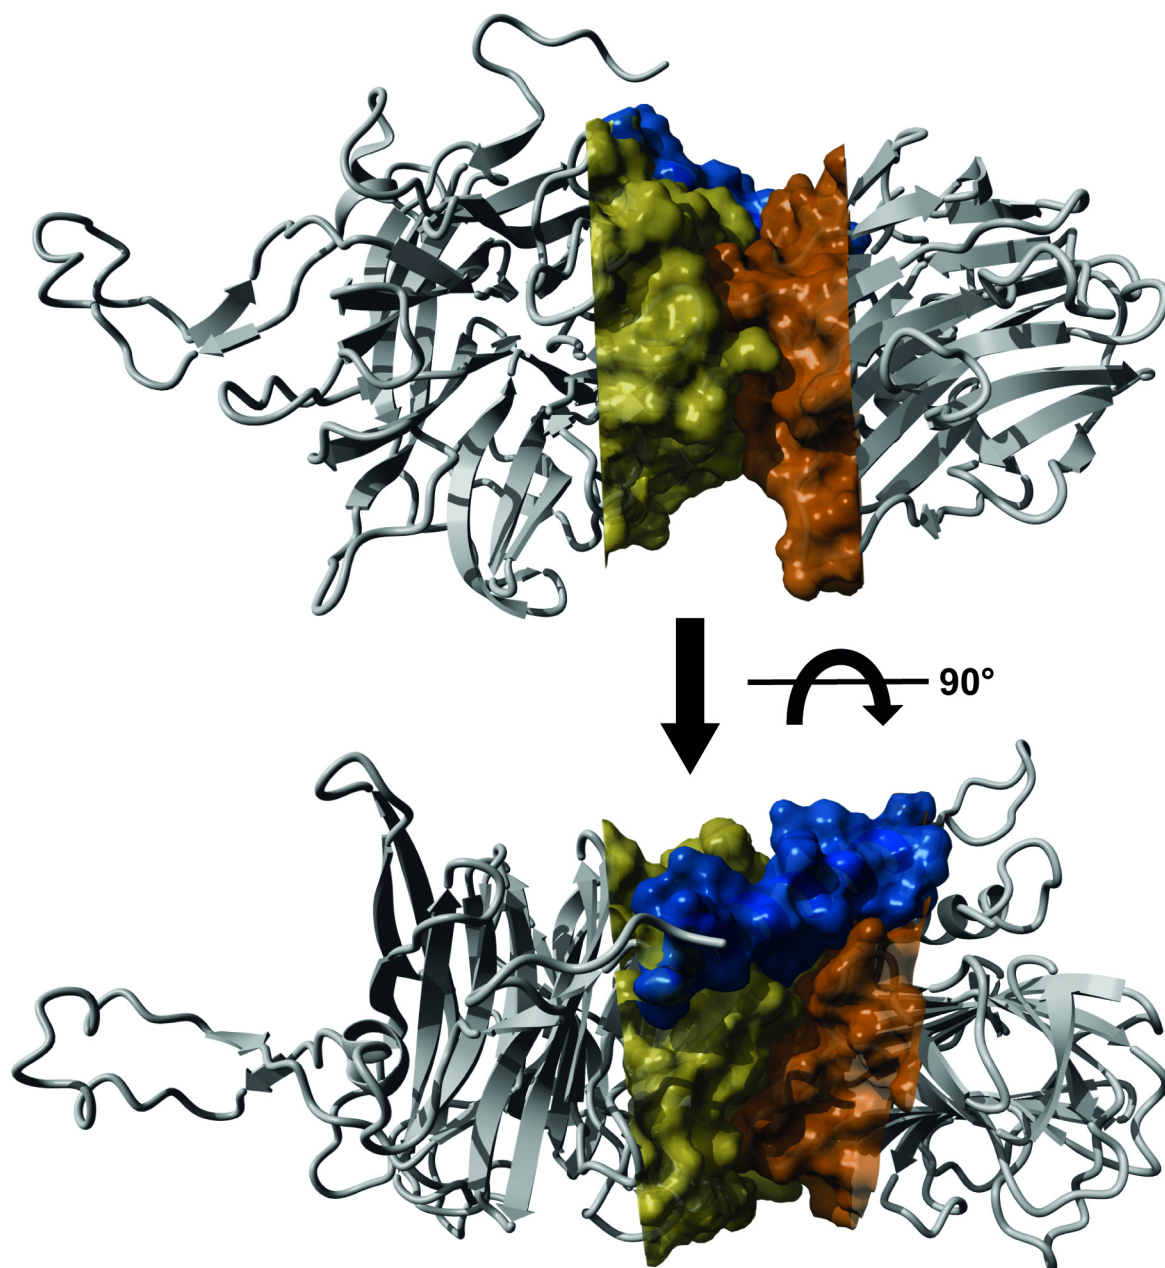

**Fig 7. Contact site between TconTS-CD and LD.** Homology model of TconTS1 was calculated using the crystal structure of TcTS (PDB: 3b69) as template and the software Yasara. Molecular surface of TconTS1 was calculated using the surface module of Yasara Structure. Illustrated are the parts of TconTS-CD (yellow) and LD (orange), which are in close contact to each other. The  $\alpha$ -helix connecting both domains is shown in blue.

doi:10.1371/journal.pntd.0004344.g002

## Reference

1. Waespy M, Gbem TT, Elenschneider L, Jeck A-P, Day CJ, Hartley-Tassell L, et al. (2015) Carbohydrate Recognition Specificity of Trans-sialidase Lectin Domain from *Trypanosoma congolense*. PLoS Negl Trop Dis 9(10): e0004120. doi:10.1371/journal.pntd.0004120 PMID: 26474304
